# Supplementary material
Source: PubMed Central journal article supplement (PMC10364625)

**Supplemental Figure 2. Maturity, exhaustion, antigen-experience, and activation markers that were not significantly different between patients with GvHD who died vs. survived.**

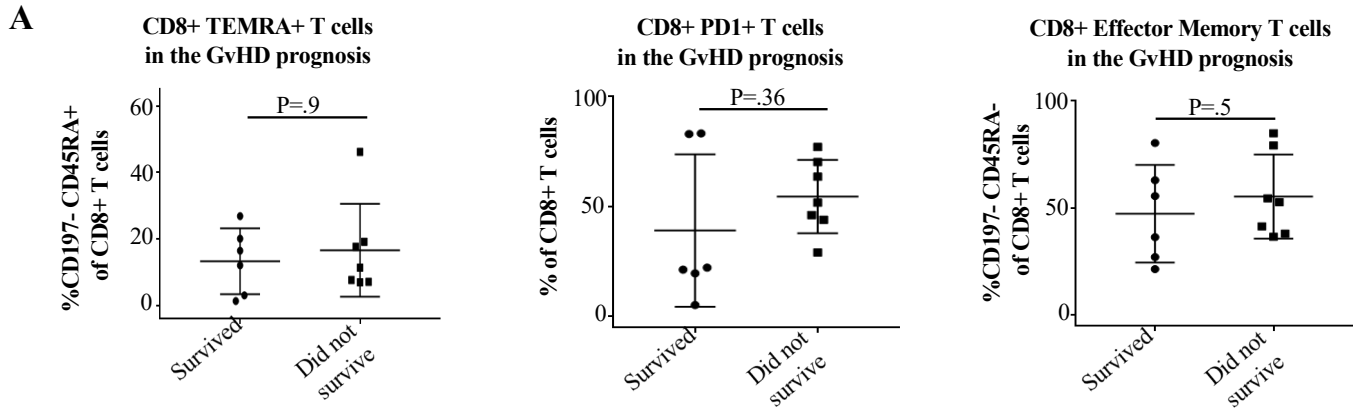

Supplement: NIHMS1649719-supplement-ajt16405-sup-0002-FigS2.pdf [file NIHMS1649719-supplement-ajt16405-sup-0002-FigS2.pdf]
