# Supplementary material
Source: PubMed Central journal article supplement (PMC10364625)

Supplemental Figure 1. Representative flow cytometry plots for the values show in Figures 2 and 7

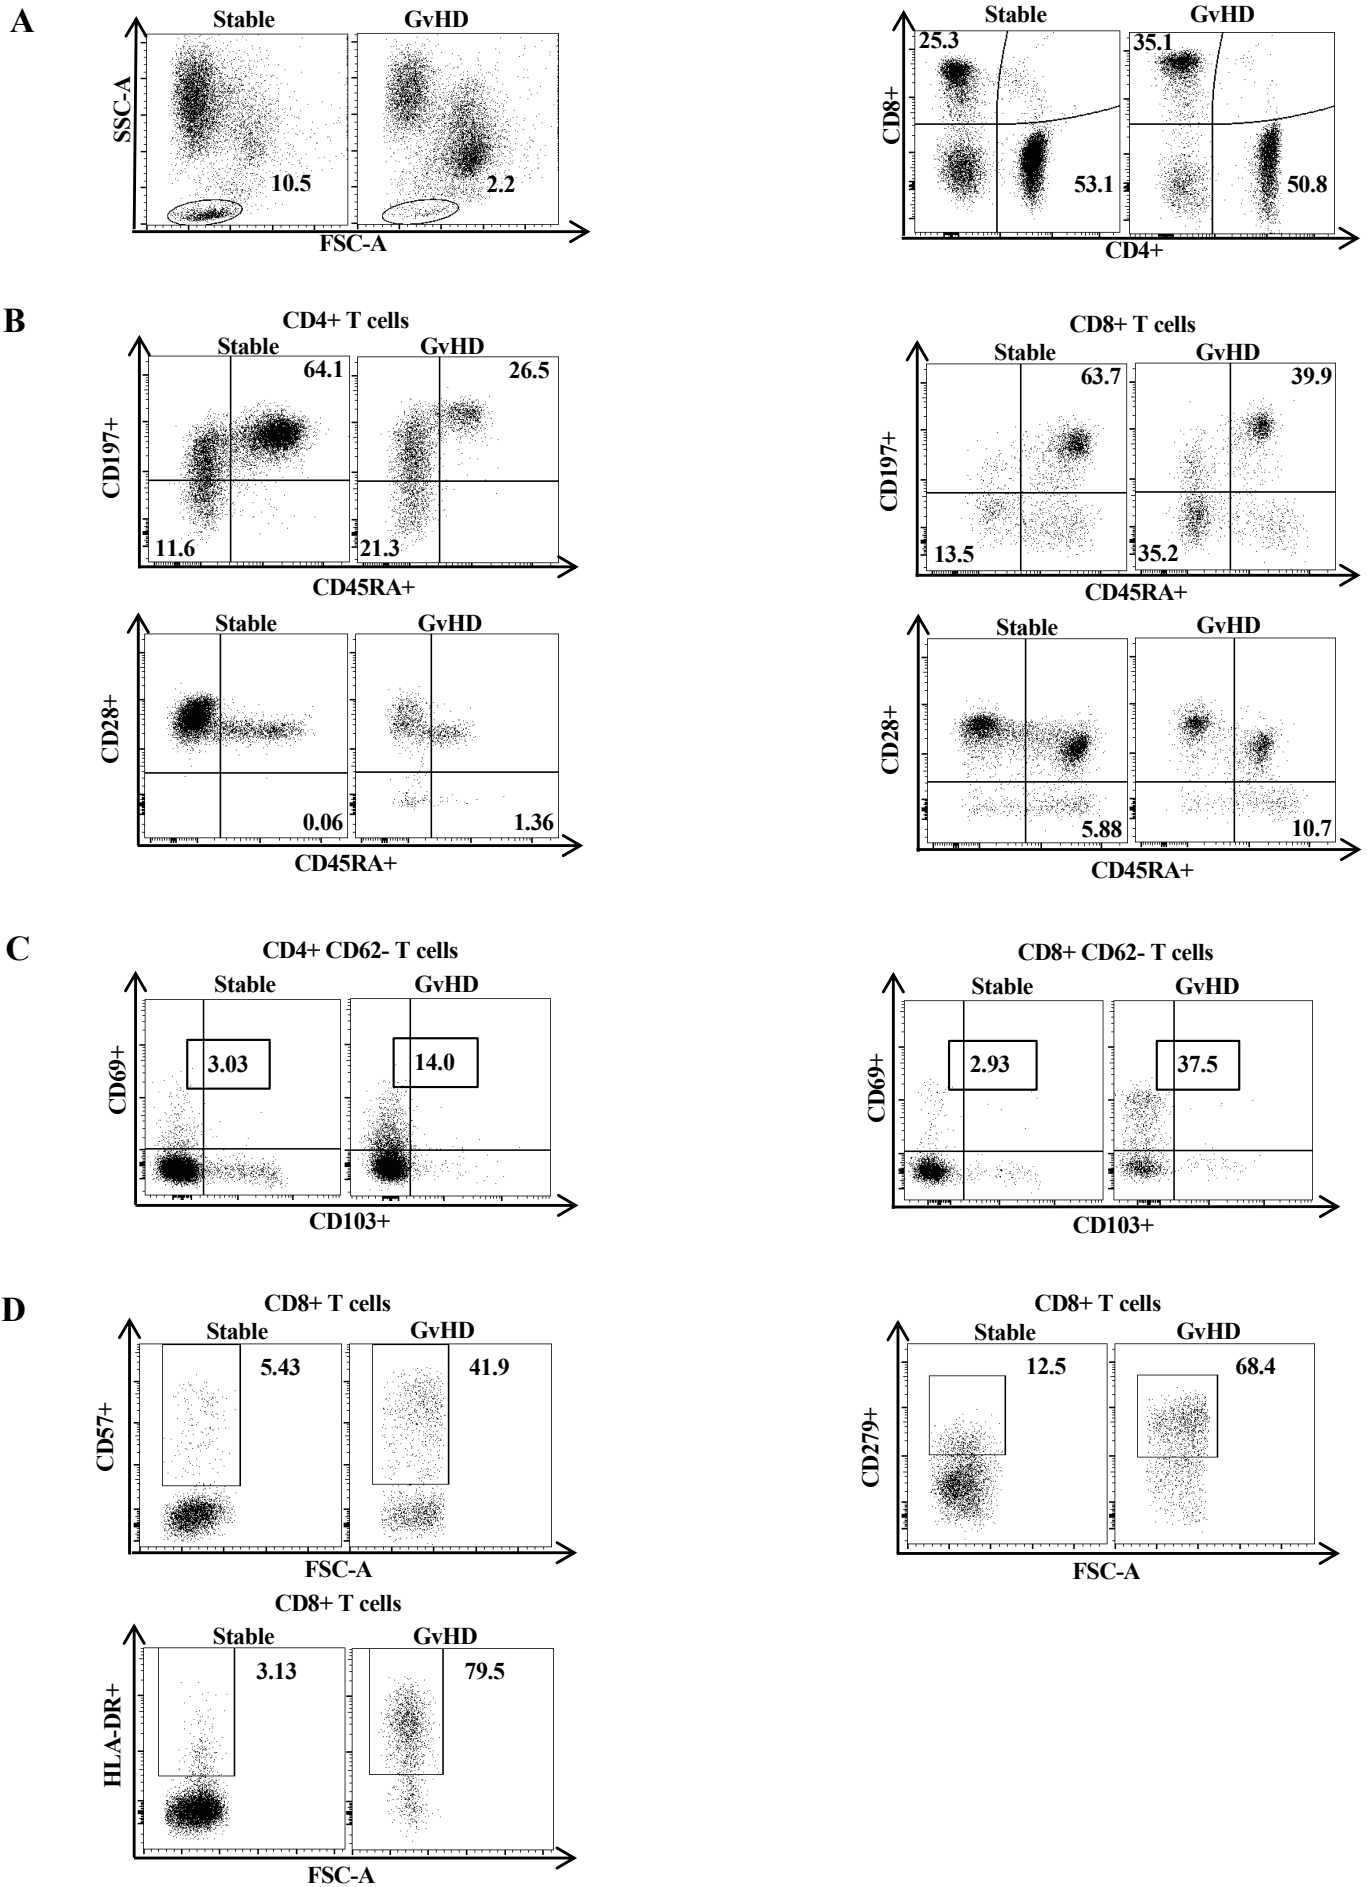

Supplement: NIHMS1649719-supplement-ajt16405-sup-0001-FigS1.pdf [file NIHMS1649719-supplement-ajt16405-sup-0001-FigS1.pdf]
